# Supplementary material for: Influence of In doping on the thermoelectric properties of an AgSbTe2 compound with enhanced figure of merit
Source: Royal Society of Chemistry journal article supplement (doi:10.1039/c3ta14547f), 2013-12-16
Supplement: c3ta14547f.pdf [file c3ta14547f.pdf]

## *Electronic Supplementary information (ESI)*

### **Influence of In doping on the thermoelectric properties of AgSbTe<sub>2</sub> compound with enhanced figure of merit<sup>†</sup>**

Rajeshkumar Mohanraman<sup>1,2,3\*</sup>, Raman Sankar<sup>4</sup>, Karunakara Moorthy Boopathi<sup>1,3,5</sup>,  
Fang-Cheng Chou<sup>4,5</sup>, Chih-Wei Chu<sup>5</sup>, Chih-Hao Lee<sup>1,6</sup>, and Yang-Yuan Chen<sup>2, 7\*</sup>

<sup>1</sup> Department of Engineering and System Science, National Tsing Hua University, Taiwan, ROC

<sup>2</sup> Institute of Physics, Academia Sinica, Taiwan, ROC

<sup>3</sup> Nano Science and Technology, Taiwan International Graduate Program, Academia Sinica, Taiwan, ROC

<sup>4</sup> Center for Condensed Matter Sciences, National Taiwan University, Taiwan, ROC

<sup>5</sup> Research Center for Applied Science, Academia Sinica, Taiwan, ROC

<sup>6</sup> National Synchrotron Radiation Research Center, Taiwan, ROC

<sup>7</sup> Graduate Institute of Applied Physics, National Chengchi University, Taiwan, ROC

## **X-ray Fluorescence Spectroscopy Analysis**

The chemical composition of the as-prepared ingots was determined using wavelength dispersive X-Ray fluorescence spectroscopy (WD-XRF, Rigaku ZSX primus II).

**Table S1.**

| Nominal Composition                                     | Measured Composition                                        |
|---------------------------------------------------------|-------------------------------------------------------------|
| AgSbTe <sub>2</sub>                                     | AgSb <sub>0.9</sub> Te <sub>2.01</sub>                      |
| AgSb <sub>0.97</sub> In <sub>0.03</sub> Te <sub>2</sub> | AgSb <sub>0.96</sub> In <sub>0.037</sub> Te <sub>2.01</sub> |
| AgSb <sub>0.95</sub> In <sub>0.05</sub> Te <sub>2</sub> | AgSb <sub>0.93</sub> In <sub>0.06</sub> Te <sub>2.02</sub>  |
| AgSb <sub>0.93</sub> In <sub>0.07</sub> Te <sub>2</sub> | AgSb <sub>0.91</sub> In <sub>0.08</sub> Te <sub>2.02</sub>  |

2013- 6-19 17:53

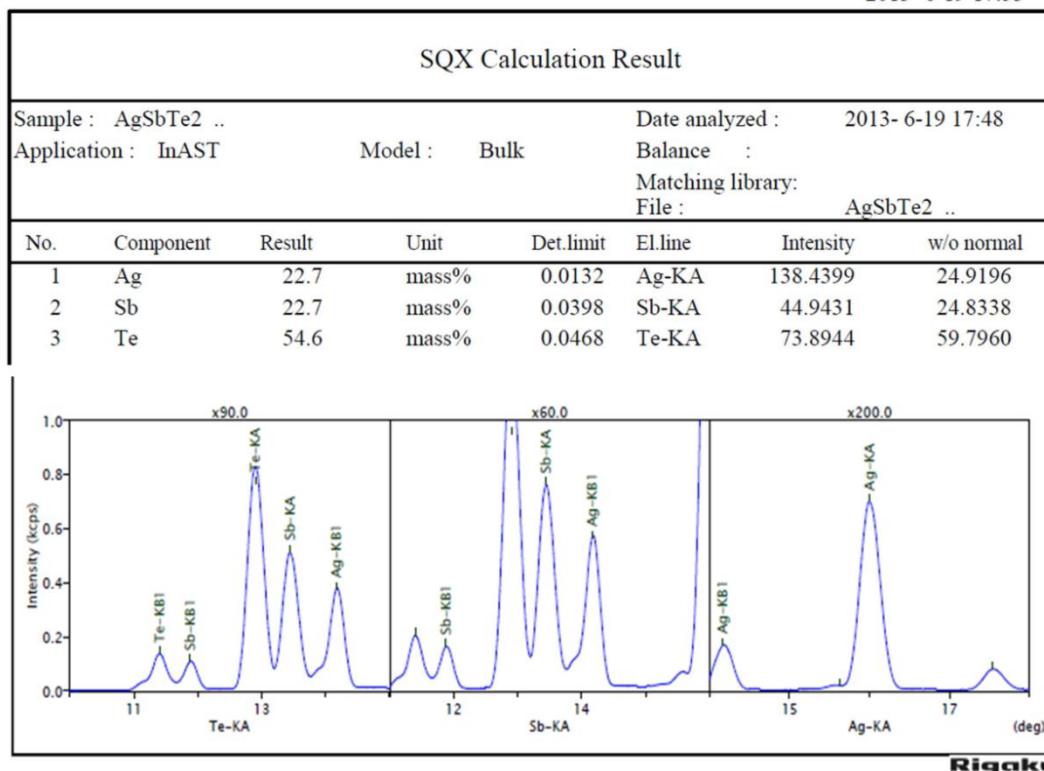

Fig. S1 XRF data for AgSbTe<sub>2</sub> sample.

2013-11- 5 22:21

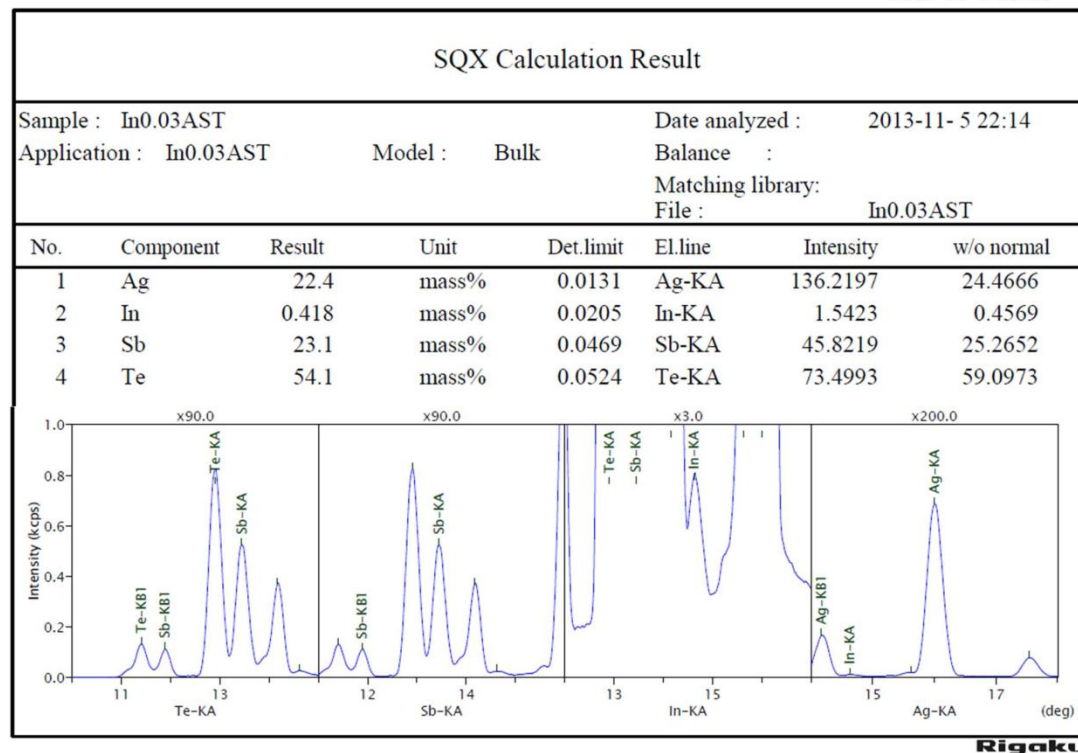

Fig. S2 XRF data for Ag(Sb<sub>0.97</sub>In<sub>0.03</sub>)Te<sub>2</sub> sample.

2013-11- 5 23:17

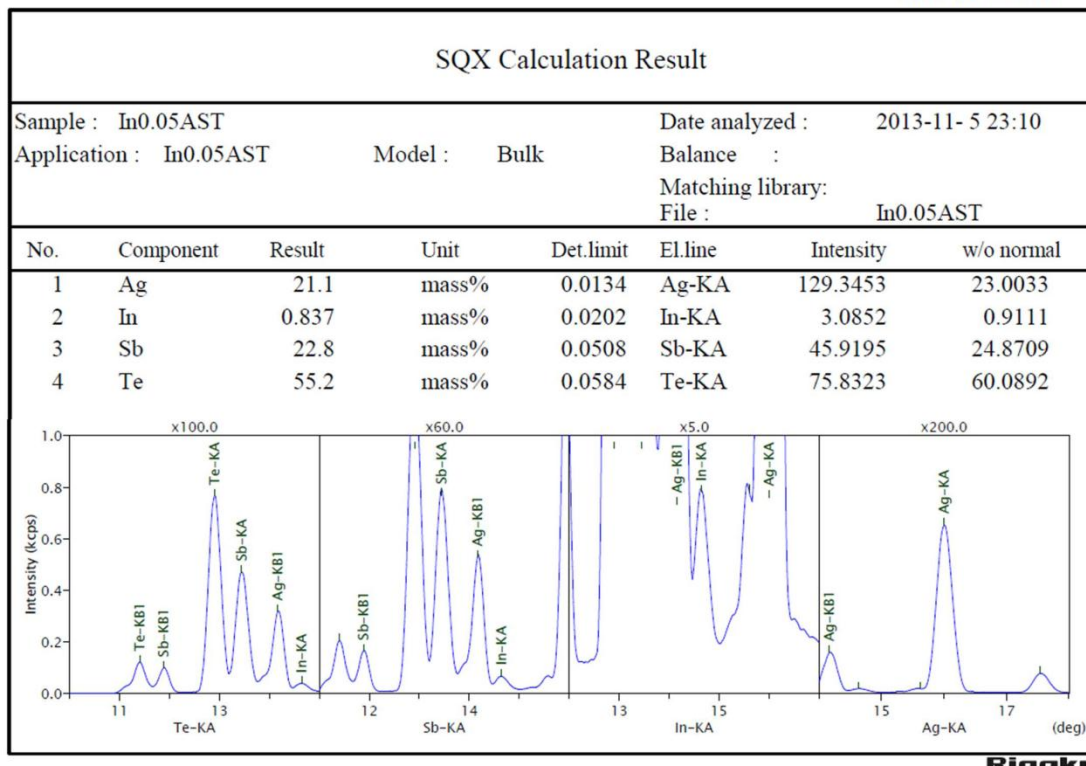

**Fig. S3** XRF data for Ag(Sb<sub>0.95</sub>In<sub>0.05</sub>)Te<sub>2</sub> sample.

2013-11- 5 23:00

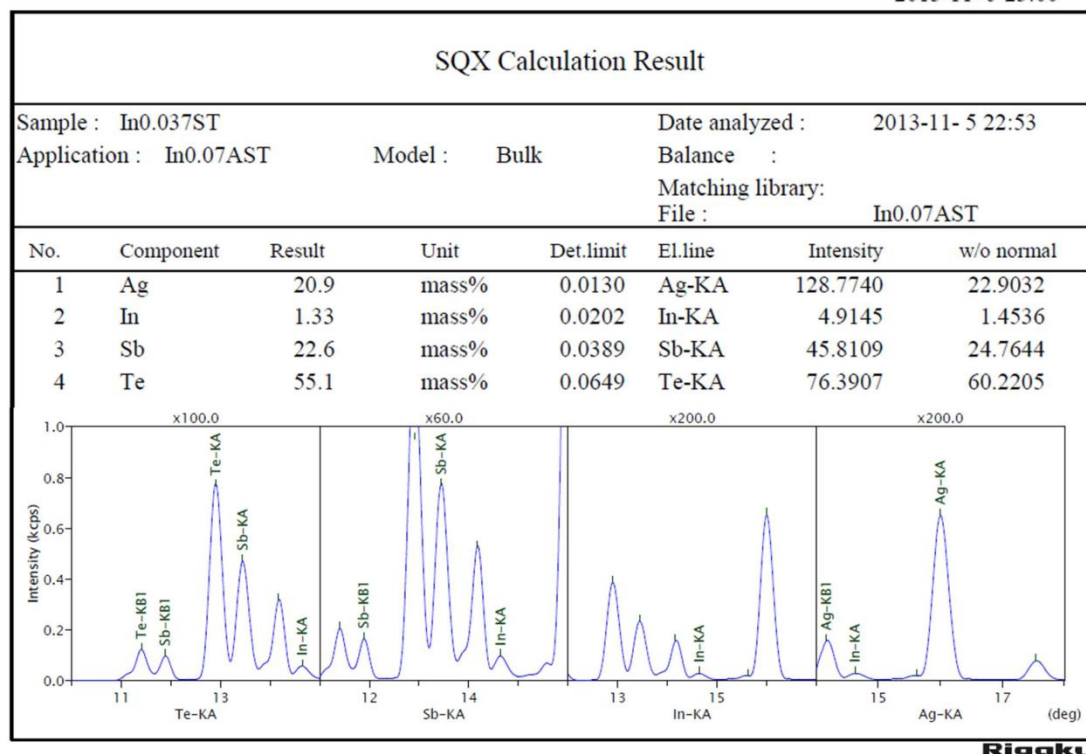

**Fig. S4** XRF data for Ag(Sb<sub>0.95</sub>In<sub>0.05</sub>)Te<sub>2</sub> sample.

## Seebeck coefficient ( $\alpha$ ) vs carrier concentration ( $n_H$ )

Assuming a single band dominated by acoustic phonon scattering, we express the

Seebeck coefficient and electrical conductivity as <sup>1-3</sup>

$$\alpha = \frac{k_B}{e} \left[ \frac{2F_1(\zeta_F)}{F_0(\zeta_F)} - \zeta_F \right] \dots \dots \dots (1)$$

$$p = \frac{4\pi(2k_B T m^*)^{\frac{3}{2}}}{h^3} F_{\frac{1}{2}}(\zeta_F) \dots \dots \dots (2)$$

$$F_j(x) = \int_0^\infty \frac{\zeta_F^j d\zeta_F}{1 + \exp(\zeta_F - x)} \dots \dots \dots (3)$$

where  $F_j(x)$  is the Fermi integral,  $p$  is the hole concentration,  $\zeta_F$  is the reduced fermi level,  $m^*$  is the effective mass,  $h$  is the Planck constant and  $k_B$  is the Boltzmann constant, respectively.

## Calculation of Lorentz number (L)

The Lorentz number  $L$  is calculated by the formula as follows <sup>4,5</sup>

$$L = \left( \frac{k_B}{e} \right)^2 \left( \frac{3F_0(\xi)F_2(\xi) - 4F_1^2(\xi)}{F_0(\xi)} \right) \quad (4)$$

where the reduced Fermi energy  $\xi$  is obtained from the Seebeck value according to Equation 1. By inserting  $\xi$  into Equation 4,  $L$  values were calculated to be in the range from  $1.71 \times 10^{-8}$  to  $1.74 \times 10^{-8} \text{ V}^2\text{K}^{-2}$ .

## References

1. T. Caillat, J.-P. Fleurial and A. Borshchevsky, *J. Phys. Chem. Solid.*, 1997, **58**, 1119–1125.
2. G. S. Nolas, J. W. Sharp and H. J. Goldsmid, in *Thermoelectrics: Basic Principles and New Materials Developments*, Springer-Verlag, Heidelberg, **2001**.
3. A. Zevalkink, E. S. Toberer, W. G. Zeier, E. Flage-Larsen and G. J. Snyder, *Energy Environ. Sci.*, 2011, **4**, 510–518.
4. S. Y. Wang, W. J. Xie, H. Li and X. F. Tang, *Intermetallics.*, 2011, **19**, 1024.
5. J. P. Heremans, V. Jovovic, E. S. Toberer, A. Saramat, K. Kurosaki, A. Charoenphakdee, S. Yamanaka and G. J. Snyder, *Science.*, 2008, **321**, 554.

## Thermal stability

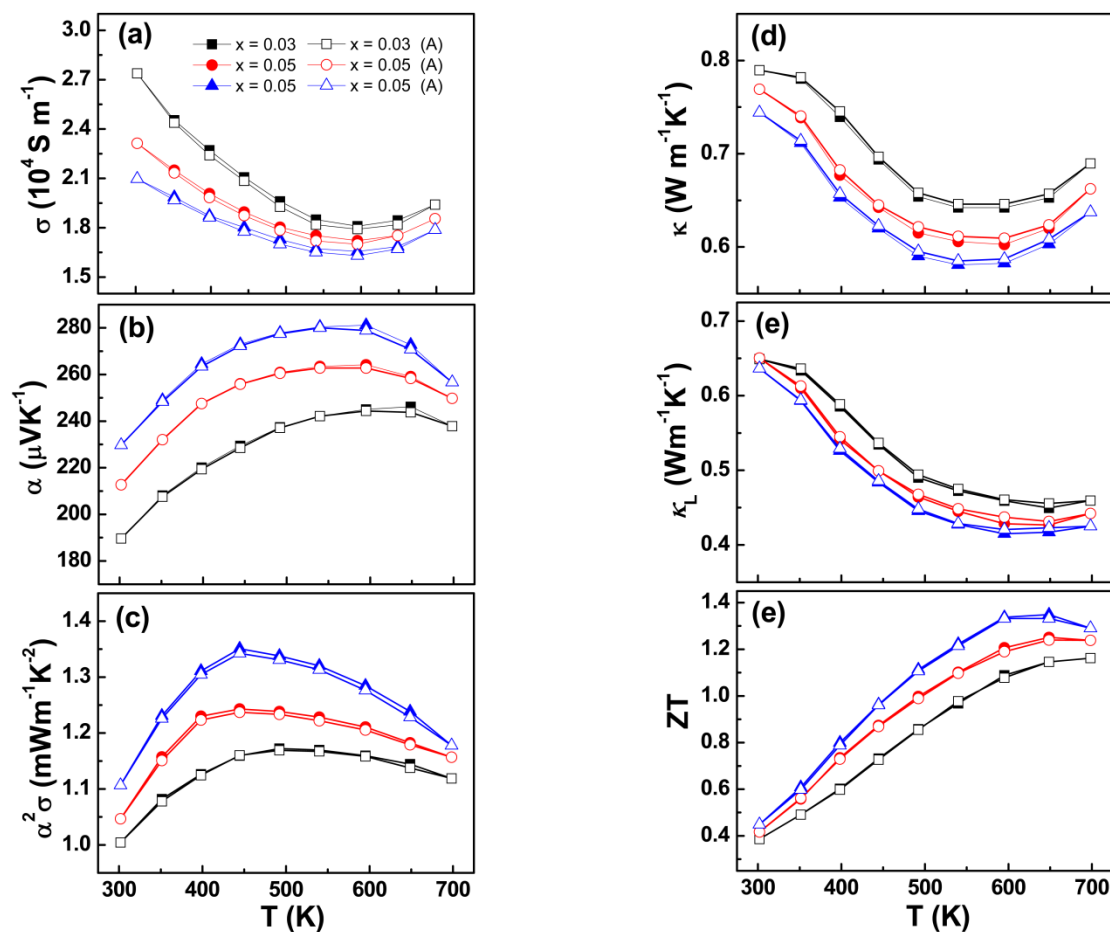

**Fig. S5.** Temperature dependences of (a) electrical conductivity, (b) Seebeck coefficient, (c) power factor, (d) total thermal conductivity, (e) lattice thermal conductivity and (f) thermoelectric figure of merit  $ZT$  for samples of  $\text{Ag}(\text{Sb}_{1-x}\text{In}_x)\text{Te}_2$  ( $x = 0.03, 0.05, \text{ and } 0.07$ ). “A” presents the samples annealed at 723 K for 5 days.
